# Supplementary material for: Motor unit number index (MUNIX) loss of 50% occurs in half the time of 50% functional loss according to the D50 disease progression model of ALS
Source: PubMed Central journal article supplement (PMC9998642; doi:10.1038/s41598-023-30871-x), 2023-03-09
Supplement: 41598_2023_30871_MOESM1_ESM.pdf [file 41598_2023_30871_MOESM1_ESM.pdf]

**Motor unit number index (MUNIX) loss of 50% occurs in half the time of 50% functional loss according to the D50 disease progression model of ALS**

Theresa Ebersbach<sup>1,4</sup>, Annekathrin Roediger<sup>1,4,\*</sup>, Robert Steinbach<sup>1</sup>, Martin Appelfeller<sup>1</sup>, Anke Tuemmler<sup>1</sup>, Beatrice Stubendorff<sup>1</sup>, Hubertus Axer<sup>1</sup>, Otto W. Witte<sup>1,2</sup> and Julian Grosskreutz<sup>2,3</sup>

1 Department of Neurology, Jena University Hospital, Friedrich Schiller University, Jena, Germany

2 Center for Healthy Ageing, Jena University Hospital, Jena, Germany

3 Precision Neurology, University of Lübeck, Lübeck, Germany

4 These authors contribute equally and share first authorship: Theresa Ebersbach and Annekathrin Roediger

\*Correspondence to

Dr. med. Annekathrin Roediger

Department of Neurology, University Hospital Jena

Am Klinikum 1, 07747 Jena

E-Mail: [annekathrin.roediger@med.uni-jena.de](mailto:annekathrin.roediger@med.uni-jena.de)

**Supplementary table 1** Sample calculation of M50 for one patient

| <b>Mean values of healthy controls</b>                                                                                                       |               | MUNIX APB | MUNIX TA | MUNIX ADM |              |
|----------------------------------------------------------------------------------------------------------------------------------------------|---------------|-----------|----------|-----------|--------------|
|                                                                                                                                              |               | 168.58    | 137.22   | 154.43    |              |
| <b>MUNIX measurements of patient X</b>                                                                                                       |               |           |          |           |              |
| Symptom onset                                                                                                                                | MUNIX date    | MUNIX APB | MUNIX TA | MUNIX ADM |              |
| June 2016                                                                                                                                    | June 12, 2018 | 37.89     | 78.79    | 80.20     |              |
| <b>Calculation for patient X</b>                                                                                                             |               |           |          |           | Sum          |
| In relation to the mean value of controls in %                                                                                               |               | 22.48     | 57.42    | 51.93     | 131.83       |
| Function from the mean of controls in % (131.83 divided by three measured values)                                                            |               |           |          |           | 43.94        |
| Loss from the mean of controls in %                                                                                                          |               |           |          |           | <b>56.06</b> |
| Months from symptom onset to measurement                                                                                                     |               |           |          |           | <b>24.38</b> |
| <b>M50 (months until loss of 50%): disease duration at MUNIX in months divided by loss from the mean of controls in % multiplied with 50</b> |               |           |          |           |              |
|                                                                                                                                              |               | 15.72     | 28.63    | 25.36     | <b>21.75</b> |

ADM, abductor digiti minimi; APB, abductor pollicis brevis; MUNIX, motor unit number index; TA, tibialis anterior.

**Supplementary Table 2** Characteristics of the ALS cohort stratified by disease accumulation

|                    | <b>Disease accumulation</b>                                     |                                                         |                                                   |
|--------------------|-----------------------------------------------------------------|---------------------------------------------------------|---------------------------------------------------|
|                    | <b>rD50 Phase I (<math>0 \leq \text{rD50} &lt; 0.25</math>)</b> | <b>II (<math>0.25 \leq \text{rD50} &lt; 0.5</math>)</b> | <b>III/IV (<math>\text{rD50} \geq 0.5</math>)</b> |
|                    | <b>n = 92</b>                                                   | <b>n = 107</b>                                          | <b>n = 23</b>                                     |
| M50 in months      | 12.7 (7.67 - 27.9)                                              | 15.0 (10.7 - 26.4)                                      | 17.8 (7.48 - 22.4)                                |
| MUNIX APB          | 73.3 (28.0 - 119.3)                                             | 38.9 (8.72 - 74.6)                                      | 2.00 (2.00 - 32.6)                                |
| MUNIX TA           | 86.9 (21.8 - 121.5)                                             | 44.2 (11.1 - 86.2)                                      | 36.7 (2.00 - 75.3)                                |
| MUNIX ADM          | 89.2 (44.5 - 124.6)                                             | 67.5 (22.1 - 109.8)                                     | 19.7 (8.17 - 53.1)                                |
| MUSIX200 in months | 12.6 (8.32 - 22.6)                                              | 19.6 (12.8 - 34.9)                                      | 19.5 (8.70 - 32.4)                                |
| MUSIX APB          | 83.3 (59.8 - 139.4)                                             | 95.3 (71.7 - 207.2)                                     | 250.0 (88.5 - 250.0)                              |
| MUSIX TA           | 54.8 (45.5 - 105.2)                                             | 57.1 (47.5 - 200.1)                                     | 63.5 (45.9 - 250.0)                               |
| MUSIX ADM          | 88.8 (69.7 - 135.7)                                             | 93.8 (72.9 - 163.6)                                     | 123.1 (92.3 - 192.2)                              |
| CMAP50 in months*  | 15.6 (8.63 - 33.4)                                              | 18.3 (12.0 - 33.7)                                      | 19.7 (7.85 - 27.2)                                |
| CMAP APB           | 5.93 (3.47 - 7.98)                                              | 3.68 (1.51 - 6.36)                                      | 0.50 (0.50 - 3.57)                                |
| CMAP TA            | 4.47 (1.41 - 5.94)                                              | 2.84 (0.61 - 4.45)                                      | 2.32 (0.50 - 3.35)                                |
| CMAP ADM           | 7.34 (5.19 - 9.63)                                              | 6.15 (2.96 - 8.88)                                      | 2.54 (1.39 - 6.53)                                |
| D50                | 32.9 (20.7 - 61.6)                                              | 26.9 (17.6 - 41.7)                                      | 23.1 (8.56 - 29.4)                                |
| ALS phenotype      |                                                                 |                                                         |                                                   |
| Classic            | 51                                                              | 66                                                      | 11                                                |
| Bulbar             | 33                                                              | 35                                                      | 11                                                |
| Flail Arm          | 3                                                               | 1                                                       | 0                                                 |
| Flail Leg          | 2                                                               | 0                                                       | 0                                                 |
| Pyramidal          | 3                                                               | 1                                                       | 0                                                 |
| PLMN               | 0                                                               | 4                                                       | 1                                                 |

Values are given as median and interquartile range or numbers, ALS, amyotrophic lateral sclerosis. CMAP, compound muscle action potential; MUNIX, motor unit number index; MUSIX motor unit size index; LSPR, laboratory-supported probable. PLMN, pure lower motor neuron. \*related to n = 86 at Phase I because 6 patients had no loss of function in comparison to the mean of CMAP of healthy controls. Phenotype in accordance to Chio et al (Chio et al 2011).

## Supplementary Figure 1

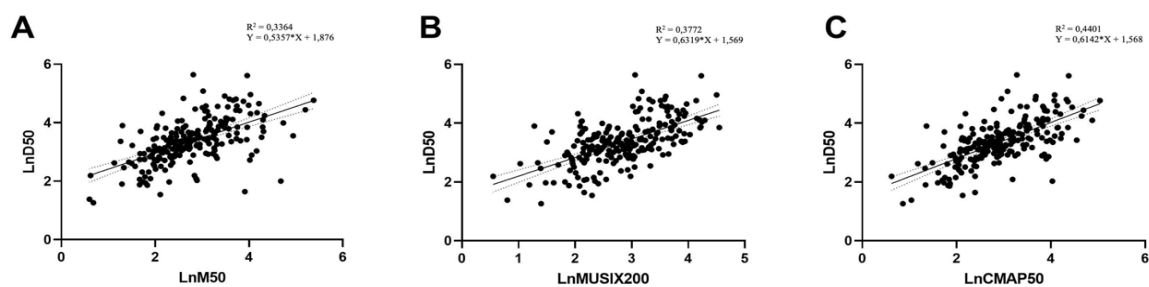

Linear regression of logarithmized (A) M50 and D50, (B) MUSIX200 and D50, (C) CMAP50 and D50. Lines indicate regression and 95% confidence interval.
